# Supplementary material
Source: Research Square preprint supplement (doi:10.21203/rs.3.rs-9248474/v1)

**Table 1**. Participant characteristics by randomization assignment


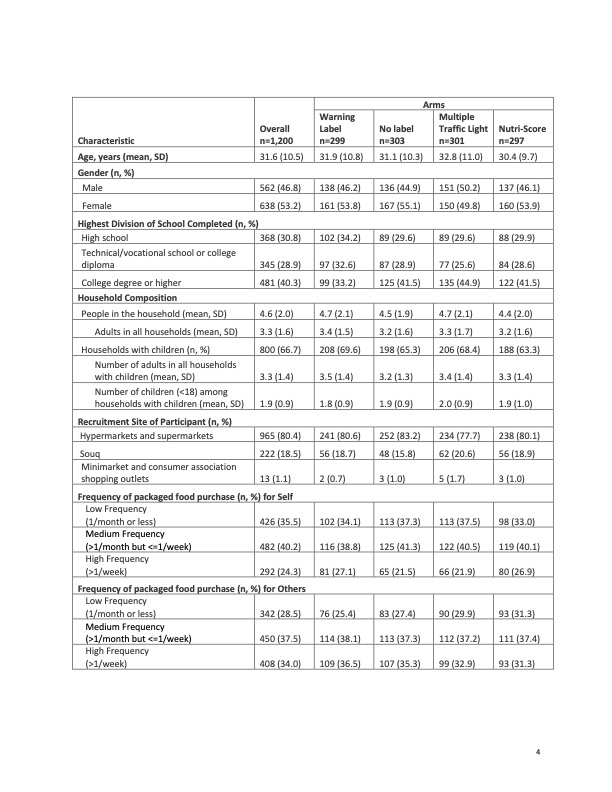

Supplement: Supplementary file 3 [file 560b721ccf808e9ad35cd77d.docx]
